# Supplementary material
Source: Springer Nature journal article supplement (https://www.springermedizin.de/resource/supplementary/12894_2012_218_MOESM6_ESM.pdf/9513234)
Supplement: MOESM6 [file 9513234]

|                                                | <b>rs2042791</b> | <b>rs2042792</b>               | <b>rs12623569</b> | <b>rs16851495</b>               |
|------------------------------------------------|------------------|--------------------------------|-------------------|---------------------------------|
| <b>mRNA</b>                                    | <b>A1175C</b>    | <b>C [exon 11<br/>3'+15] G</b> | <b>A1366C</b>     | <b>G [exon 14<br/>3' +25] A</b> |
| <b>Protein</b>                                 | <b>Q361H</b>     | <b>-</b>                       | <b>K425T</b>      | <b>-</b>                        |
| Homozygous<br>Major allele                     | 19               | 26                             | 29                | 43                              |
| Heterozygous                                   | 33               | 28                             | 25                | 17                              |
| Homozygous Minor<br>allele                     | 8                | 6                              | 6                 | 0                               |
| Sample population<br>Minor allele<br>frequency | .408             | .333                           | .308              | .142                            |
| HapMap minor<br>allele frequency               | .39              | .39                            | .30               | .08                             |
